1 **Intrinsically photosensitive retinal ganglion cell mediated pupil**  
2 **function is impaired in Parkinson's disease**

3  
4 Daniel S. Joyce<sup>1,2,6</sup>, Beatrix Feigl<sup>1,3,5</sup>, Graham Kerr<sup>1,4</sup>, Luisa Roeder<sup>1,4</sup>, Andrew J. Zele<sup>1,2\*</sup>

5  
6 <sup>1</sup> *Institute of Health and Biomedical Innovation,*

7 <sup>2</sup> *Visual Science Laboratory, School of Optometry and Vision Science,*

8 <sup>3</sup> *Medical Retina Laboratory, School of Biomedical Sciences,*

9 <sup>4</sup> *Movement Neuroscience Program, School of Exercise and Nutrition Sciences,*

10 *Queensland University of Technology (QUT), Brisbane, Australia.*

11 <sup>5</sup> *Queensland Eye Institute, Brisbane, Australia*

12 <sup>6</sup> *Department of Psychiatry and Behavioral Sciences, School of Medicine, Stanford*

13 *University, USA.*

14  
15  
16  
17  
18  
19  
20  
21 **\*Corresponding Author:**

22 Address: Visual Science Laboratory, Institute of Health and Biomedical Innovation, 60 Musk  
23 Avenue, Kelvin Grove, Queensland 4059, Australia.

24 Email: [andrew.zele@qut.edu.au](mailto:andrew.zele@qut.edu.au).

25

26

## Abstract

27 Parkinson's disease is characterised by non-motor symptoms including sleep and circadian  
28 disruption, but the underlying aetiology is not well understood. Melanopsin-expressing  
29 intrinsically photosensitive Retinal Ganglion Cells (ipRGC) transmit light signals from the  
30 eye to brain areas controlling circadian rhythms and the pupil light reflex. Here we evaluate  
31 the hypothesis that these non-motor symptoms in people with Parkinson's disease may be  
32 linked to ipRGC dysfunction. Using chromatic pupillometry, we measured intrinsic  
33 (melanopsin-mediated) ipRGC and extrinsic (rod/cone photoreceptor-mediated) inputs to the  
34 pupil control pathway in a group of optimally medicated participants with a diagnosis of  
35 Parkinson's disease (PD,  $n = 17$ ) compared to controls ( $n = 12$ ). Autonomic tone was  
36 evaluated by measuring pupillary unrest in darkness. The PD participants underwent  
37 additional clinical assessments using the Unified Parkinson's disease Rating Scale (UPDRS)  
38 and the Hoehn and Yahr scale (H&Y).

39 Compared to controls, the PD group demonstrated an attenuated pupil constriction amplitude  
40 in response to long wavelength pulsed stimulation, and reduced post-illumination pupil  
41 response (PIPR) amplitude in response to both short wavelength pulsed and sinusoidal  
42 stimulation. In the PD group, PIPR amplitude did not correlate with measures of sleep  
43 quality, retinal nerve fibre layer thickness, UPDRS or H&Y score, or medication dosage.  
44 Both groups exhibited similar pupillary unrest in darkness.

45 We show that melanopsin and the rod/cone-photoreceptor contributions to the pupil control  
46 pathway are impaired in people with early-stage Parkinson's disease. Given that the deficits  
47 are independent of clinical assessment severity and are observed despite optimal medication,  
48 the melanopsin-mediated PIPR may be a biomarker for the detection of Parkinson's disease  
49 and its continued monitoring in both medicated and unmedicated individuals.

50

51 **Key words:** melanopsin, Parkinson's disease, Post-Illumination Pupil Response, sleep

52 **Abbreviations:** ACE-R = Addenbrooke's Cognitive Examination – Revised, DA =  
53 dopamine, FWHM = full width half maximum, H&Y = Hoehn and Yahr scale, ipRGC =  
54 intrinsically photosensitive Retinal Ganglion Cell, LEDD = Levodopa Equivalent Daily  
55 Dosage, MMSE = Mini-Mental State Examination, OCT = Optical Coherence Tomography,

56 PAP = Phase Amplitude Percentage, PIPR = Post-Illumination Pupil Response, PSQI =  
57 Pittsburgh Sleep Quality Index, RMS = Root Mean Square, RNFL = Retinal Nerve Fibre  
58 Thickness, SCN = Suprachiasmatic Nucleus, UPDRS = Unified Parkinson's Disease Rating  
59 Scale

60

61

## Introduction

62 Parkinson's disease (PD) is a debilitating disorder characterised by a loss of dopamine (DA)  
63 producing neurons in regions of the basal ganglia, impairing autonomic function and  
64 resulting in motor symptoms including tremor, rigidity, and bradykinesia (Chaudhuri *et al.*,  
65 Jankovic, 2008). By the time these symptoms manifest, up to 60% of dopaminergic cells  
66 within the substantia nigra pars compacta are destroyed (Dauer and Przedborski, 2003). Non-  
67 motor symptoms can precede motor symptoms and include sleep disturbances and daytime  
68 sleepiness, fatigue, depressed mood and cognitive impairments (Chaudhuri *et al.*, Pagan,  
69 2012). Due to their earlier onset, these symptoms may have clinical utility as early  
70 biomarkers of the disease (Chaudhuri *et al.*, Pagan, 2012).

71 The aetiology underlying sleep and circadian disturbances in Parkinson's disease is not well  
72 understood, but is hypothesised to include dysregulation of the circadian system due to  
73 reduced dopaminergic neurotransmission (for review see Videnovic and Golombek, 2013). In  
74 people with Parkinson's disease, a 4-fold reduction in melatonin expression has been  
75 observed without altered circadian phase (Videnovic *et al.*, 2014), while in mouse models of  
76 the disease suprachiasmatic nucleus (SCN) signalling is reduced. These studies suggest  
77 degradation of environmental light signal processing via the retinohypothalamic tract that  
78 projects from the retina to the SCN.

79 In humans, the origin of the retinohypothalamic tract is a novel class of photoreceptors in the  
80 eye called intrinsically photosensitive retinal ganglion cells (ipRGCs) (Dacey *et al.*, 2005,  
81 Liao *et al.*, 2016, Nasir-Ahmad *et al.*, 2017). IpRGCs make up less than 0.5% of all retinal  
82 ganglion cells (Liao *et al.*, 2016, Nasir-Ahmad *et al.*, 2017) yet project to over a dozen brain  
83 areas including those involved in circadian photoentrainment, sleep and mood regulation, and  
84 the pupil light reflex (Provencio *et al.*, 1998, Gooley *et al.*, 2001, Berson *et al.*, 2002, Hattar  
85 *et al.*, 2002, Dacey *et al.*, 2005, Hattar *et al.*, 2006, Baver *et al.*, 2008, Do *et al.*, 2009,  
86 Hannibal *et al.*, 2014). The transmission of light signals to the brain by ipRGCs is initiated at  
87 two sites within the retina, either intrinsically via the endogenous melanopsin photopigment  
88 expressed in the ipRGC body (soma and dendrites) in the inner retina (Hattar *et al.*, 2002,  
89 Provencio *et al.*, 2002, Belenky *et al.*, 2003, Do *et al.*, 2009) or via extrinsic (synaptic) input  
90 from rod and/or cone photoreceptors in the outer retina (Dacey *et al.*, 2005) that also involve  
91 dopaminergic amacrine intermediary cells (Belenky *et al.*, 2003, Zhang *et al.*, 2008, Van  
92 Hook *et al.*, 2012, Hu *et al.*, 2013). Melanopsin is maximally light sensitive in the short

93 wavelength (blue) region of the visible spectrum and its physiological response is  
94 characterised by slow temporal kinetics and sustained signalling after light cessation (Dacey  
95 *et al.*, 2005); in humans, the kinetics of the pupil light response after stimulus offset (the  
96 Post-Illumination Pupil Response, PIPR) provide a signature, non-invasive measure of  
97 melanopsin function (Gamlin *et al.*, 2007, Markwell *et al.*, 2010, Adhikari *et al.*, 2015,  
98 Adhikari *et al.*, 2016) that can be differentiated from extrinsic photoreceptor inputs using  
99 non-invasive chromatic pupillometry (see *Stimuli and Experimental Paradigms and*  
100 *Analyses*) (Kardon *et al.*, 2009, Park *et al.*, 2011, Feigl and Zele, 2014). Pupillometric  
101 assessment of ipRGCs in humans has shown clinical promise for a range of retinal and non-  
102 retinal diseases (for review see Feigl and Zele (2014)); pupil constriction in response to light  
103 stimuli has been used to evaluate outer retinal rod/cone dysfunction in Parkinson's disease  
104 (Stergiou *et al.*, 2009) but intrinsic ipRGC-mediated pupil function has not been investigated  
105 in Parkinson's disease. Our primary aim was to determine if ipRGC function is impaired in  
106 people with Parkinson's disease by performing chromatic pupillometry on optimally  
107 medicated Parkinson's disease participants compared to a healthy age-matched control group.

108 It is well established that autonomic nervous system function is impaired in Parkinson's  
109 disease (Dewey, Visser *et al.*, 2004), and the resting pupil diameter is set by the autonomic  
110 nervous system through a dynamic equilibrium between parasympathetic input to the  
111 pupillary sphincter and sympathetic input to the dilator muscle (Lowenstein *et al.*, 1963,  
112 McDougal and Gamlin, 2015). Early research in unmedicated Parkinson's patients showed  
113 increased pupil diameters after light adaptation, reduced pupil constriction amplitude and  
114 prolonged time to pupil constriction (Micieli *et al.*, 1991). In a group of mostly (71%,  $n = 12$ )  
115 unmedicated Parkinson's disease patients the pupillary unrest in darkness was increased (Jain  
116 *et al.*, 2011). To evaluate the level of autonomic tone in optimally mediated people with  
117 Parkinson's disease, the secondary aim was to measure pupillary unrest in the absence of  
118 light stimulation.

## 119 **Materials and Methods**

### 120 **Participants**

121 Twenty-nine participants were recruited, comprising of 17 people with Parkinson's disease  
122 (mean age = 64.9 years, SD = 6.1) and 12 control participants (mean age = 59.7 years, SD =  
123 4.1). As shown in Table 1, participants with Parkinson's disease were assessed as early stage

124 with a mild to moderate disease severity (Unified Parkinson's Disease Rating Scale (Fahn *et*  
125 *al.*, 1987, Ramaker *et al.*, 2002); Hoehn & Yahr (Hoehn and Yahr, 1967)) and were  
126 independent and cognitively intact (Mini-Mental State Examination (Folstein *et al.*, 1975).  
127 All people with Parkinson's disease were optimally medicated during all measurements  
128 (Table 1).

129 Table 1. Parkinson's disease characterisation.

|             | Gender | Age<br>(years) | LEDD   | MMSE | ACE-R | UPDRS | H&Y |
|-------------|--------|----------------|--------|------|-------|-------|-----|
| Participant |        |                |        |      |       |       |     |
| PD1         | F      | 59             | 998    | 30   | 98    | 34    | 1.5 |
| PD2         | M      | 63             | 750    | 30   | 89    | 20    | 1   |
| PD3         | M      | 66             | 400    | 30   | 87    | 45    | 2.5 |
| PD4         | M      | 71             | 1064   | 29   | 89    | 30    | 2   |
| PD5         | M      | 56             | 400    | 29   | 90    | 16    | 2   |
| PD6         | M      | 74             | 1222.5 | 30   | 97    | 38    | 2.5 |
| PD7         | F      | 69             | 400    | 29   | 98    | 24    | 2   |
| PD8         | F      | 65             | 933    | 29   | 91    | 32    | 2   |
| PD9         | M      | 66             | 225    | 30   | 89    | 26    | 2   |
| PD10        | M      | 72             | 300    | 28   | 79    | 44    | 2   |
| PD11        | M      | 63             | 525    | 26   | 75    | 58    | 2.5 |
| PD12        | M      | 64             | 475    | 30   | 94    | 33    | 1   |
| PD13        | F      | 56             | 612.5  | 29   | 98    | 35    | 1   |
| PD14        | M      | 57             | 400    | 29   | 98    | 34    | 1   |
| PD15        | M      | 70             | 0      | 28   | 89    | 43    | 2   |
| PD16        | F      | 59             | 450    | 30   | 100   | 60    | 1   |
| PD17        | M      | 74             | 400    | 29   | 91    | 45    | 1   |
| Mean        |        | 64.9           | 597.2  | 29.1 | 91.3  | 36.3  | 1.7 |
| SD          |        | 6.1            | 302.1  | 1.1  | 6.9   | 12.0  | 0.6 |

130 *Note:* LEDD = Levodopa equivalent daily dosage in mg; MMSE = Mini-mental state examination;  
131 ACE-R = Addenbrooke's cognitive examination - revised; UPDRS = Unified Parkinson's disease  
132 rating scale; H&Y = Hoehn and Yahr scale. Participant PD15 was not medicated at the time of  
133 participation and is excluded from the mean and SD calculation.

134 A comprehensive ophthalmic examination was completed in all Parkinson's disease and  
135 control participants. All participants had a best corrected visual acuity  $\geq 6/6$  (Bailey-Lovie  
136 Log MAR Chart) and no ocular pathology on slit lamp examination or ophthalmoscopy.  
137 Intraocular pressure measured with non-applanation tonometry (iCare, Finland Oy, Helsinki,  
138 Finland) was within the normal range ( $< 21$  mmHg) before dilation and at the conclusion of  
139 testing. All participants had normal trichromatic colour vision as assessed by the Farnsworth  
140 D-15. Participants with intra-ocular lenses were excluded from participation in this study and  
141 all participants had clear lenses.

142 Retinal nerve fibre layer thickness was measured using Optical Coherence Tomography  
143 (OCT) (Cirrus-HD OCT, Carl Zeiss Meditec, Inc., Dublin, CA, USA and Nidek RS-3000  
144 RetinaScan Advance, Nidek Co., Ltd., Tokyo, Japan). Given the evidence for sleep

145 disturbances in people with Parkinson's disease and that ipRGCs mediate the environmental  
146 light signals for circadian photoentrainment, sleep quality was assessed in all participants  
147 using the Pittsburgh Sleep Quality Index questionnaire (PSQI) (Buysse *et al.*, 1989).

148 All experimental protocols were approved by the University Human Research Ethics  
149 Committee and participants provided informed consent in accordance with the tenets of the  
150 Declaration of Helsinki.

## 151 **Pupillometer**

152 Light stimuli were generated using a custom built extended Maxwellian-view optical system  
153 (Beer *et al.*, 2005, Kankipati *et al.*, 2010, Joyce *et al.*, 2015, Joyce *et al.*, 2016). The light  
154 from two 5 mm diameter LEDs (short wavelength, 'blue' appearing light,  $\lambda_{\max} = 465$  nm; full  
155 width half maximum (FWHM) = 19 nm; long wavelength, 'red' appearing light,  $\lambda_{\max} = 638$   
156 nm, FWHM = 15 nm) was imaged in the plane of the pupil via two Fresnel lenses (100 mm  
157 diameter, 127 mm and 70 mm focal lengths; Edmund Optics, Singapore) and a 5° light  
158 shaping diffuser (Physical Optics Corp., California USA) which generated a 35.6° stimulus  
159 light. The consensual pupil response was recorded with a Pixelink camera (IEEE-1394, PL-  
160 B741 FireWire; 640x480 pixels; 60 frames.s<sup>-1</sup>) through a telecentric lens (Computar 2/3" 55  
161 mm and 2× Extender C-Mount) under infrared LED illumination ( $\lambda_{\max} = 851$  nm). A chin  
162 rest, temple bars and a head restraint maintained alignment in Maxwellian-view. Custom  
163 software coded in Matlab (version 7.12.0, Mathworks, Massachusetts USA) controlled  
164 stimulus presentation, pupil recording and analysis. Details of the pupillometry measurements  
165 are given elsewhere (Feigl *et al.*, 2011, Zele *et al.*, 2011).

## 166 **Stimuli**

167 Short wavelength stimuli included predominant intrinsic ipRGC inputs to the pupil control  
168 pathway shown to be mediated by the melanopsin photopigment (Gamlin *et al.*, 2007,  
169 Markwell *et al.*, 2010, Adhikari *et al.*, 2015). Long wavelength stimuli served as a measure of  
170 activity biased to the extrinsic outer retina photoreceptor activity and thus as a control  
171 stimulus that has minimal intrinsic ipRGC (melanopsin-mediated) activation. The light  
172 stimulation protocol consisted of a 10 s pre-stimulus baseline recording, pulsed (8 s  
173 rectangular) or phasic (12 s, 0.5 Hz sinusoidal) stimulus presentation, and a 40 s post-  
174 stimulus recording period (see Fig. 1A,B & C,D for the stimulus protocol). Short and long  
175 wavelength stimulus irradiances were equated to 15.1 log photons.cm<sup>-2</sup>.s<sup>-1</sup> at the cornea.



176 Given the older age of the participants, retinal irradiances were estimated based upon  
177 established corrections for age-related changes in the optical density of the media of the eye  
178 (cornea, lens, aqueous and vitreous humours) for stimuli greater than 3° in diameter (van de  
179 Kraats and van Norren, 2007). It was calculated that the average attenuation by the optical  
180 media of the short wavelength stimuli was 0.54 log units in the PD group and 0.50 log units  
181 in the control group. The optical media attenuated the long wavelength stimuli by 0.16 log  
182 units for both groups. Long wavelength stimulation was therefore a control condition  
183 invariant to group membership and age and autonomic reactivity. To account for the  
184 proposed bistability of melanopsin (Mure *et al.*, 2009) and participant fatigue (Kankipati *et*  
185 *al.*, 2010, Feigl *et al.*, 2011) stimuli were alternated, beginning with the long wavelength  
186 stimulus followed by the short wavelength stimulus. Two recordings for each wavelength of  
187 the pulsed and sinusoidal were obtained and the data report the average response for each  
188 condition. Pupillary unrest (see *Experimental Paradigms and Analyses* section) was recorded  
189 in the dark for 5 minutes at the end of the pulsed and sinusoidal testing to measure autonomic  
190 tone and fatigue. Each participant therefore underwent a total of 9 trials during a recording  
191 period lasting approximately 1.5 hours.

## 192 **Experimental Paradigms**

193 In order to investigate the interaction between inner and outer retina photoreceptor inputs to  
194 the pupil control pathway during pulsed stimulation, constriction amplitude was measured  
195 (Kardon *et al.*, 2009, Joyce *et al.*, 2015). To determine the interaction between inner and  
196 outer retinal contributions to the phasic pupil response of the dark adapted pupil, two  
197 parameters were estimated – the peak to trough amplitude (Joyce *et al.*, 2015), and the Phase  
198 Amplitude Percentage [PAP: (long wavelength peak to trough – short wavelength peak to  
199 trough) / long wavelength peak to trough] (Feigl and Zele, 2014). To assess intrinsic  
200 melanopsin signalling, the post-illumination pupil response amplitude can be measured at any  
201 time >1.7 s after stimulus offset (Adhikari *et al.*, 2016). The melanopsin-mediated PIPR  
202 under short wavelength conditions demonstrates a sustained constriction (that is, a reduction  
203 from baseline diameter) that is the signature of melanopsin activity signalled via the intrinsic  
204 ipRGC pathway. In contrast, the PIPR amplitude to long wavelength stimulation is less  
205 sustained and rapidly returns to baseline due to the low sensitivity of melanopsin to long  
206 wavelength light (Dacey *et al.*, 2005, Kardon *et al.*, 2009). We calculated the optimal timing  
207 of the PIPR metric given our equipment, sample, and stimulus conditions: Using the control  
208 group data only, the pulsed and sinusoidal PIPR data were averaged within the short and long



209 wavelength conditions. Subtracting the short from long wavelength data determined the  
210 timing of the largest difference between these retinal inputs to the PIPR, which was the 1 s  
211 window (Park *et al.*, 2011) of the 11th second after light offset. Thus the PIPR value used for  
212 all analyses (both PD and control groups) was 11 s after light offset.

213 Parkinson's disease is characterised by changes in autonomic tone (Goetz *et al.*, 1986, Micieli  
214 *et al.*, 2003), whereby the balance of sympathetic and parasympathetic systems is impaired.  
215 Because the dilator and sphincter pupil muscles that maintain the steady-state pupil diameter  
216 receive sympathetic and parasympathetic innervation respectively (for review see (McDougal  
217 and Gamlin, 2015)), we measured pupil diameter in the dark for 5 minutes in order to  
218 quantify changes in the spontaneous oscillations of the pupil (i.e. pupil unrest) during this  
219 period, which may differ with disease status. We used Fourier analysis to calculate metrics of  
220 RMS, dominant frequency (Hz), dominant frequency (dB), and approximate entropy (Pincus,  
221 1991, Morrison *et al.*, 2008). Data were analysed in Matlab 2016a (The MathWorks, Inc.,  
222 Natick, Massachusetts, USA). We also calculated the average pupillary unrest index (PUI;  
223 (Lüdtke *et al.*, 1998)) for each individual, over a shortened duration of five minutes in order  
224 to minimise fatigue because it was conducted at the end of the experimental session. The PUI  
225 is an additive measure of consecutive pupil diameters to quantify pupil oscillation instability  
226 (Lüdtke *et al.*, 1998).

## 227 **Statistical Analysis**

228 Each pupil tracing was individually visualised and blinks were linearly interpolated in  
229 Matlab. In order to minimise the correlations between the pupil light reflex metrics when  
230 expressed in millimetres (Joyce *et al.*, 2016), the data were normalised to the average pupil  
231 diameter of the first 10 seconds and expressed as percentage baseline units. The non-normally  
232 distributed data for the PD and control groups were compared using independent samples  
233 Mann-Whitney U tests. Correlations within the PD group data were explored using  
234 Spearman's rank order test. All statistical analyses were performed in SPSS Statistics (v23.0,  
235 IBM, Armonk, NY, USA) using two-tailed tests with an alpha level of  $p < .05$ . Participant data  
236 are reported using box plots that demonstrate the *median*, *interquartile range*, *maximum* and  
237 *minimum*.

## 238 **Procedure**

239 Participants with Parkinson's disease were assessed for disease severity (UPDRS, H&Y) and  
240 cognitive impairment (MMSE) prior to visual testing. All participants were provided the  
241 PSQI and instructed in its use (sent via mail and returned on the day of testing), to assess  
242 their quality of sleep in the four weeks prior to visual testing. Upon presentation participants  
243 had a comprehensive ophthalmic exam, before dilation of their stimulated eye (Tropicamide  
244 0.5% w/v, Bausch & Lomb). Once the pupil had fully dilated the participant was briefed of  
245 the protocols and aligned in the pupillometer. All pupillometry was conducted in the dark and  
246 before each trial participants adapted to the dim room illumination (< 1 lux) for 7 minutes.  
247 Between trials the participants were permitted to remove their head from the pupillometer but  
248 remained seated. Following pupillometry, participants had their fundus and lens examined  
249 (slit lamp), retinal nerve fibre layer thickness measured via OCT, and IOP re-assessed. The  
250 entire experimental and ophthalmic testing was completed within two hours.

251

## Results

252 The Optical Coherence Tomography measurements of the optic disc retinal nerve fibre layer  
253 thickness were similar between the PD group (*median* = 93.00  $\mu\text{m}$ , *IQR* = 19.50) and control  
254 group (89.50  $\mu\text{m}$ , 21.00) ( $p = .902$ ). Sleep quality as measured by the PSQI was reduced in  
255 the PD group (7.00, 4.00) compared to controls (4.00, 3.00), but this difference was not  
256 significant ( $p = .264$ ) and groups did not differ along derived 2-factor dimensions of sleep  
257 quality ( $p = .517$ ) and sleep efficiency ( $p = .578$ ) (Magee *et al.*, 2008).

258 The pupil light reflex (*mean  $\pm$  95% confidence intervals*) for the control (left panels) and PD  
259 (right panels) groups in response to the pulsed and sinusoidal stimuli are shown in Fig. 1A-  
260 D). Fig. 1A,B,C,D demonstrate the reduced PIPR amplitude during long compared to short  
261 wavelength stimulation. The pupillary unrest waveforms (*mean  $\pm$  95% confidence intervals*)  
262 are shown for the control and PD group participants in Fig. 1E and F, respectively.

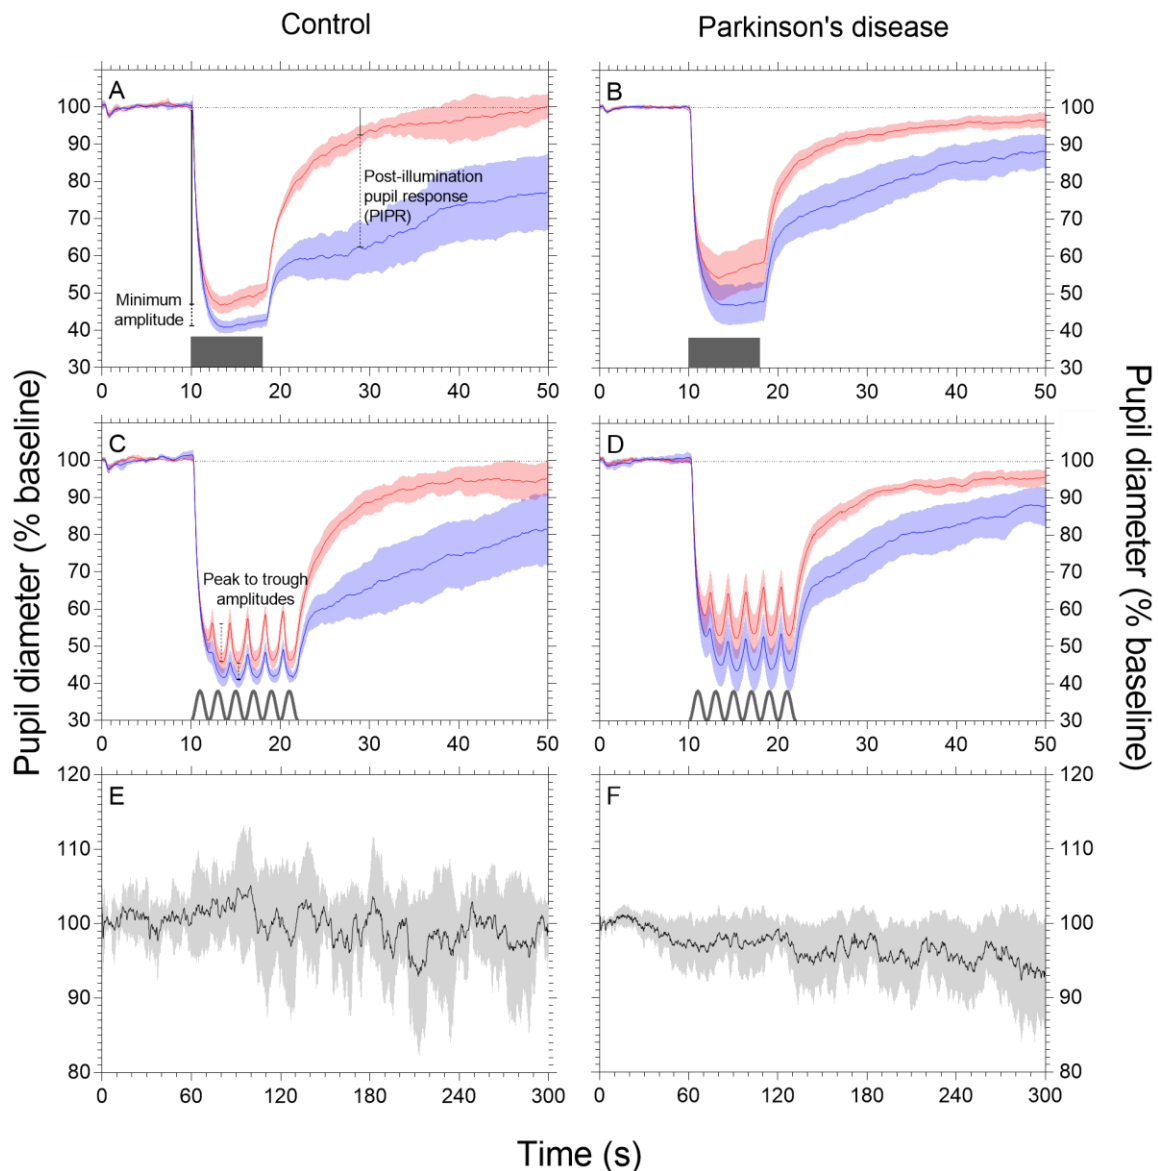

263

264 Figure 1. Normalised mean pupil waveforms during pulsed and sinusoidal  
265 stimulation, and pupillary unrest. Left panels show the control data ( $n = 12$ ), right  
266 panel show the data for the participants with Parkinson's disease ( $n = 17$ ). The pupil  
267 metrics are illustrated in Panels A and C (minimum constriction amplitude, PIPR  
268 amplitude and peak to trough amplitude). A schematic of the test stimuli are depicted  
269 on the abscissa in the upper panels (pulsed stimuli) and middle panels (sinusoidal  
270 stimuli). The mean unrest data are shown in Panels E and F. Blue, red and grey  
271 shadings indicate 95% confidence intervals. To control for individual differences in  
272 baseline pupil diameter, the data are normalised to the first 10 s of recording.

273 Box plots (Fig 2) show all participant data for the minimum amplitude (pulsed stimuli) and  
274 PIPR amplitude pupil metrics (pulsed and sinusoidal stimuli). The minimum pupil  
275 constriction amplitude for short wavelength pulsed stimulation was similar between the PD  
276 (*median* = 43.35%, *interquartile range* = 10.57%) and control groups (39.93%, 2.79%) ( $p =$   
277 .079), whereas the minimum constriction amplitude for long wavelength pulsed stimulation  
278 was reduced in the PD group (51.48%, 9.73%) compared to the control group (46.10%,  
279 6.05%) ( $p = .034$ ). The melanopsin-mediated PIPR amplitude was measured in the pulsed  
280 and sinusoidal pupillometry protocols. For short wavelength stimuli that have a high  
281 melanopsin excitation, the pulsed PIPR amplitude was 14.73% higher in Parkinson's disease  
282 participants (80.32%, 23.16%) compared to controls (65.59%, 20.52%) ( $p = .018$ ), indicating  
283 reduced melanopsin contributions to this process (i.e., closer to baseline diameter in the PD  
284 group than controls). Similarly, short wavelength sinusoidal PIPR amplitude was 12.96%  
285 higher in the PD group (81.72%, 15.21%) compared to controls (68.76%, 21.32%) ( $p = .011$ ).  
286 As expected, the long wavelength (with minimal melanopsin excitation) PIPR amplitude was  
287 not different between groups for either pulsed ( $p = .325$ ) or sinusoidal ( $p = .556$ ) stimulation.

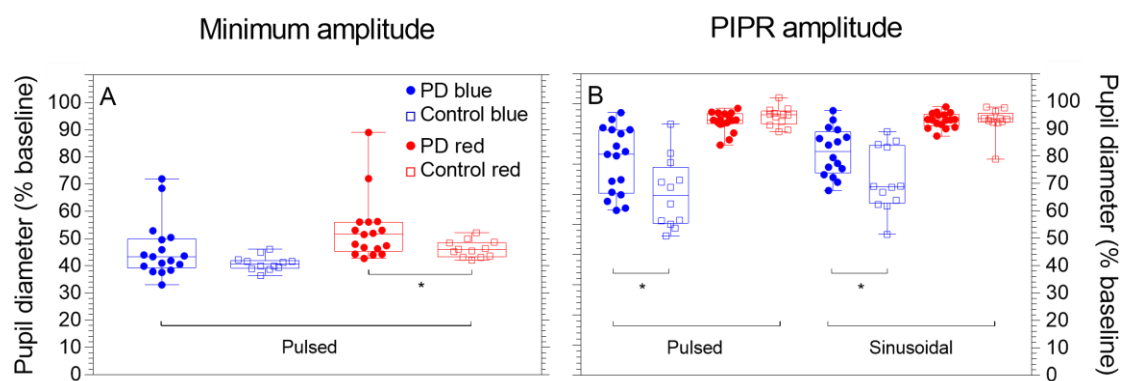

288

289 Figure 2. Minimum amplitude and post-illumination pupil response (PIPR) amplitude  
290 in response to pulsed and sinusoidal stimulation. Each data point represents an  
291 individual's mean data, boxplots depict the quartiles and whiskers the range.  
292 Asterisks indicate a significant difference between groups ( $p < .05$ ).

293 Spearman's rank-order correlations were performed to determine if the short wavelength  
294 pulsed PIPR amplitude was associated in the PD group with sleep quality (PSQI), symptom  
295 severity (UPDRS), retinal nerve fibre layer thickness (RNFL) or medication dosage (LEDD);  
296 no statistically significant correlations were observed (Table 2).

297 Table 2. Spearman's rank-order correlations between pulsed short wavelength PIPR  
 298 amplitude and Parkinson's disease markers.

|       | PIPR        | RNFL         | UPDRS        | LEDD         | PSQI        |
|-------|-------------|--------------|--------------|--------------|-------------|
| PIPR  | 1           | .107 (.682)  | .136 (.602)  | .241 (.352)  | .259 (.315) |
| RNFL  | .107 (.682) | 1            | -.248 (.337) | -.172 (.509) | .072 (.783) |
| UPDRS | .136 (.602) | -.248 (.337) | 1            | -.113 (.666) | .118 (.651) |
| LEDD  | .241 (.352) | -.172 (.509) | -.113 (.666) | 1            | .477 (.053) |
| PSQI  | .259 (.315) | .072 (.783)  | .118 (.651)  | .477 (.053)  | 1           |

299 *Note:* Data are expressed as *correlation coefficient (p value)*. PIPR = Post-illumination pupil response,  
 300 RNFL = Retinal nerve fibre layer thickness, UPDRS = Unified Parkinson's Disease Rating Scale,  
 301 LEDD = Levodopa equivalent daily dosage, PSQI = Pittsburgh sleep quality index.  $n = 17$ .

302 In response to sinusoidal stimulation, the peak to trough amplitude and the phase amplitude  
 303 percentage (PAP) of the phasic pupil response (Fig. 3) shows more variability in participants  
 304 with Parkinson's disease than controls, independent of stimulus wavelength. With short  
 305 wavelength lights that have high melanopsin excitation (Fig. 3A) the peak to trough  
 306 amplitude trended to increase in the PD group (7.95%, 3.57%), which is indicative of reduced  
 307 melanopsin contributions compared to controls (5.59%, 2.20%), but this difference was not  
 308 significant ( $p = .205$ ). Similarly, under long wavelength stimulation with low melanopsin  
 309 excitation (Fig. 3A), the peak to trough amplitude did not differ between the PD group  
 310 (12.03%, 6.41%) and controls (11.48%, 3.18%) ( $p = .471$ ). The median PAP did not  
 311 significantly differ between groups ( $p = .537$ ; Fig. 3B).

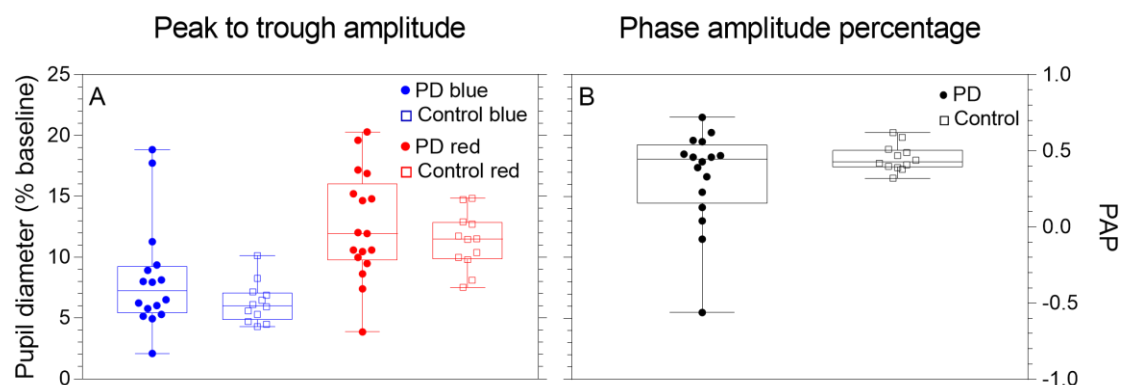

312

313 Figure 3. Peak to trough amplitude and phase amplitude percentage derived during  
 314 sinusoidal stimulation.

315 Pupillary unrest (see Fig. 1E,F for mean normalised waveforms) measured autonomic tone  
 316 and fatigue. The results of the Fourier analysis and pupillary unrest index (PUI) of each

317 individual tracing are given in Table 3; the PD and control groups did not statistically differ  
318 on any metric.

319 Table 3. Medians and interquartile ranges of the pupillary unrest metrics.

|                | RMS         | Dominant frequency (Hz) | Dominant frequency (dB) | Approximate entropy | Pupillary unrest index |
|----------------|-------------|-------------------------|-------------------------|---------------------|------------------------|
| PD             | 4.63 (2.20) | 1.10 (0.14)             | -8.87 (3.92)            | 0.25 (0.79)         | 4.69 (2.95)            |
| Control        | 4.82 (1.48) | 1.09 (0.10)             | -8.71 (1.79)            | 0.27 (1.17)         | 4.88 (6.49)            |
| <i>p</i> value | >.999       | .683                    | .507                    | >.999               | .683                   |

320 *Note:* Values are displayed as *Median (IQR)*.

321

322

## Discussion

323 This study investigated whether pupil control differed in optimally medicated individuals  
324 with Parkinson's disease compared to healthy age-matched controls. Deficits in the PD group  
325 relative to controls were observed in the post-illumination pupil response to short wavelength  
326 stimulation and the constriction amplitude in response to long wavelength stimulation.  
327 Pupillary unrest was not significantly different between groups, neither was there a  
328 significant sleep deficit as assessed with the PSQI.

329 The reduction in the post-illumination pupil response amplitude (closer to baseline diameter)  
330 in the PD group compared to controls indicates that melanopsin-mediated ipRGC inputs to  
331 pupil control pathway are impaired, and that this effect size is both large and clinically  
332 relevant (difference between medians = 17.49%). Reduced ipRGC function has been  
333 associated with impaired sleep in retinal diseases (Gracitelli *et al.*, 2015, Maynard *et al.*,  
334 2017) and while there was reduced sleep quality in patients with Parkinson's disease  
335 compared to the control group, this difference was not statistically significant. We  
336 acknowledge however that alternative methods of sleep assessment such as polysomnography  
337 may be more sensitive than the PSQI in detecting sleep deficits.

338 The PIPR amplitude was reduced in response to both pulsed and sinusoidal stimulation in the  
339 PD group, and these deficits were observed in the Parkinson's disease participants with no  
340 retinal thinning. Previous studies have identified reduced retinal nerve fibre layer thickness in  
341 people with Parkinson's disease including at the early- to mid-stage (Inzelberg *et al.*, 2004,  
342 Hajee *et al.*, 2009). That the PD group did not statistically differ in RNFL thickness  
343 compared to controls is consistent with the early stage diagnosis based upon their clinical  
344 UPDRS and H&Y scores (Kerr *et al.*, 2010). Because ipRGCs are relatively few in number  
345 (~0.1 to ~ 0.4% of all retinal ganglion cells in human retinae (Liao *et al.*, 2016, Nasir-Ahmad  
346 *et al.*, 2017), deficits in function may become apparent before a reduction in gross ganglion  
347 cell numbers can be detected by RNFL thickness.

348 Given the aetiology of Parkinson's disease, deficits in ipRGC function could be linked to a  
349 reduction in dopamine expression. IpRGCs form retinal circuits with dopaminergic amacrine  
350 cells and may themselves be sensitive to DA through feedback loops (Viney *et al.*, 2007,  
351 Vugler *et al.*, 2007, Zhang *et al.*, 2008, Allen *et al.*, 2014). The PIPR amplitude is reduced in  
352 patients with type II diabetes without diabetic retinopathy (Feigl *et al.*, 2011), which in rodent



353 models features decreased retinal dopamine (Nishimura and Kuriyama, 1985, Aung *et al.*,  
354 2014). Post-mortem examination reveals that DA cell morphology is abnormal in the  
355 Parkinson's disease retina, with reductions in both DA and DA's synthesising enzyme  
356 tyrosine hydroxylase (Nguyen-Legros, 1988, Djamgoz *et al.*, 1997), but retinal DA is reduced  
357 for unmedicated but not medicated patients with Parkinson's disease (Harnois and Di Paolo,  
358 1990). The observed deficits in PIPR amplitude could therefore reflect a mechanism other  
359 than dopaminergic dysfunction because the PD group were optimally medicated, and PIPR  
360 amplitude was not correlated with measured disease severity characteristics (Table 2).  
361 Alternate hypotheses include deficiencies in the cholinergic inputs to the pupil control system  
362 (Fotiou *et al.*, 2009), compatible with cholinergic gait disturbances in Parkinson's disease  
363 (Rochester *et al.*, 2012, Bohnen *et al.*, 2013); or reduced ipRGC signaling due to  $\alpha$ -synuclein  
364 deposition within the inner plexiform and ganglion cell layers (Beach *et al.*, 2014, Bodis-  
365 Wollner *et al.*, 2014).

366 The constriction response to long wavelength square wave stimulation, unaffected by  
367 yellowing of the lens with ageing, represents contributions of the extrinsic (rod and  
368 predominantly cone, due to their long wavelength sensitivity) ipRGC pathway. This pathway  
369 was impaired in the PD group compared to controls with a small but statistically significant  
370 difference (5.38%). Consistent with this, Micieli *et al.* (1991) used a light adapted paradigm  
371 (1200 Lux for 10 minutes) in unmedicated people with Parkinson's disease and found slower  
372 pupil constriction latency and timing as well as a larger 12.58% reduction in constriction  
373 amplitude. Pupillometric deficits in outer retinal-mediated responses may parallel visual  
374 performance deficits in the Parkinson's disease fovea (where the rods are absent), including  
375 colour vision, contrast sensitivity, and electroretinography (for review see Bodis-Wollner  
376 (2013).

377 Pupillary unrest metrics did not differ between the PD and control groups, exhibiting both  
378 low entropy (suggesting signal regularity) and similar dominant frequencies between groups.  
379 In contrast to this, Jain *et al.* (2011) reported that compared to controls, their largely (71%)  
380 unmedicated PD group with similar disease severity to our sample ( $H\&Y = 1.7 (0.6)$ ,  $UPDRS$   
381  $= 20.5 (9.6)$ ) had increased pupillary unrest using a longer 11-minute protocol. Medication  
382 may potentially influence the pupil control pathway that sets baseline pupil size, obscuring  
383 deficits in pupillary unrest mediated by the autonomic system (which balances the  
384 sympathetic and parasympathetic equilibrium), but the light-dependent PIPR drive can still  
385 demonstrate deficits in optimally medicated populations.

386 This study is the first to assess melanopsin-mediated ipRGC function in people with  
387 Parkinson's disease. We demonstrate that the post-illumination pupil response, a marker of  
388 melanopsin pathway function, is disrupted in optimally medicated individuals with the  
389 disorder. Melanopsin dysfunction may therefore be a biomarker of Parkinson's disease in  
390 both medicated and unmedicated individuals, with the potential to detect prodromal  
391 Parkinson's given that the PIPR amplitude is uncorrelated with both clinical ratings of the  
392 disease and medication dosage. Future studies with larger sample sizes could further optimise  
393 the waveform, timing, and irradiance of stimulation in assessing deficits in the PLR in people  
394 with Parkinson's, including longitudinal study to test the hypothesis that PIPR amplitude  
395 should increase (i.e. increased ipRGC dysfunction) with increasing disease duration. Given  
396 that ipRGCs are the primary conduit for photic entrainment to the solar day (Berson *et al.*,  
397 2002), and they innervate brain centres involved in sleep/wake regulation (e.g. SCN,  
398 ventrolateral preoptic area) (Hattar *et al.*, 2006) their reduced function may play an important  
399 role in the pathophysiology of sleep and circadian rhythms in Parkinson's disease.

400

## 401 **Acknowledgments**

402 We thank Dr Prema Sriram, Mr Damien Lonergan and Mr Christopher Rogers for assistance.

## 403 **Funding**

404 Partially supported by the Australian Research Council Discovery Projects (ARC-  
405 DP170100274) and an IHBI Vision and Eye Program Grant to AJZ and BF.

## 406 **Conflicts of interest**

407 None reported.

## 408 **Author contributions**

409 DSJ, BF, GK and AJZ designed the research.

410 DSJ, BF, LR, GK and AJZ performed data collection.

411 DSJ, BF, GK and AJZ performed data analysis and interpretation.

412 DSJ, BF, GK and AJZ prepared the manuscript.

413

414

## References

- 415 Adhikari P, Feigl B, Zele AJ. Rhodopsin and melanopsin contributions to the early redilation  
416 phase of the post-illumination pupil response (PIPR). *PLoS One* 2016; 11: e0161175.
- 417 Adhikari P, Zele AJ, Feigl B. The post-illumination pupil response (PIPR). *Invest*  
418 *Ophthalmol Vis Sci* 2015; 56: 3838-49.
- 419 Allen AE, Storchi R, Martial FP, Petersen RS, Montemurro MA, Brown TM, *et al.*  
420 Melanopsin-driven light adaptation in mouse vision. *Curr Biol* 2014; 24: 2481-90.
- 421 Aung MH, Park H, Han MK, Obertone TS, Abey J, Aseem F, *et al.* Dopamine deficiency  
422 contributes to early visual dysfunction in a rodent model of Type 1 Diabetes. *J Neurosci*  
423 2014; 34: 726-36.
- 424 Baver SB, Pickard GE, Sollars PJ, Pickard GE. Two types of melanopsin retinal ganglion cell  
425 differentially innervate the hypothalamic suprachiasmatic nucleus and the olivary pretectal  
426 nucleus. *Eur J Neurosci* 2008; 27: 1763-70.
- 427 Beach TG, Carew J, Serrano G, Adler CH, Shill HA, Sue LI, *et al.* Phosphorylated  $\alpha$ -  
428 synuclein-immunoreactive retinal neuronal elements in Parkinson's disease subjects.  
429 *Neurosci Lett* 2014; 571: 34-8.
- 430 Beer RD, MacLeod DIA, Miller TP. The extended Maxwellian view (BIGMAX): A high-  
431 intensity, high-saturation color display for clinical diagnosis and vision research. *Behav*  
432 *Res Methods* 2005; 37: 513-21.
- 433 Belenky MA, Smeraski CA, Provencio I, Sollars PJ, Pickard GE. Melanopsin retinal ganglion  
434 cells receive bipolar and amacrine cell synapses. *J Comp Neurol* 2003; 460: 380-93.
- 435 Berson DM, Dunn FA, Takao M. Phototransduction by retinal ganglion cells that set the  
436 circadian clock. *Science* 2002; 295: 1070-3.
- 437 Bodis-Wollner I. Foveal vision is impaired in Parkinson's disease. *Parkinsonism Relat Disord*  
438 2013; 19: 1-14.
- 439 Bodis-Wollner I, Kozlowski PB, Glazman S, Miri S.  $\alpha$ -synuclein in the inner retina in  
440 Parkinson disease. *Ann Neurol* 2014; 75: 964-6.
- 441 Bohnen NI, Frey KA, Studenski S, Kotagal V, Koeppe RA, Scott PJH, *et al.* Gait speed in  
442 Parkinson disease correlates with cholinergic degeneration. *Neurology* 2013; 81: 1611-6.
- 443 Buysse DJ, Reynolds III CF, Monk TH, Berman SR, Kupfer DJ. The Pittsburgh Sleep  
444 Quality Index: a new instrument for psychiatric practice and research. *Psychiatry Res*  
445 1989; 28: 193-213.
- 446 Chaudhuri KR, Healy DG, Schapira AHV. Non-motor symptoms of Parkinson's disease:  
447 Diagnosis and management. *The Lancet Neurology*; 5: 235-45.
- 448 Dacey DM, Liao H-W, Peterson BB, Robinson FR, Smith VC, Pokorny J, *et al.* Melanopsin-  
449 expressing ganglion cells in primate retina signal colour and irradiance and project to the  
450 LGN. *Nature* 2005; 433: 749-54.
- 451 Dauer W, Przedborski S. Parkinson's disease: Mechanisms and models. *Neuron* 2003; 39:  
452 889-909.
- 453 Dewey RB, Jr. Autonomic dysfunction in Parkinson's disease. *Neurol Clin*; 22: S127-S39.
- 454 Djamgoz MBA, Hankins MW, Hirano J, Archer SN. Neurobiology of retinal dopamine in  
455 relation to degenerative states of the tissue. *Vision Res* 1997; 37: 3509-29.
- 456 Do MTH, Kang SH, Xue T, Zhong H, Liao HW, Bergles DE, *et al.* Photon capture and  
457 signalling by melanopsin retinal ganglion cells. *Nature* 2009; 457: 281-7.
- 458 Fahn S, Elton R, Members UP. Unified Parkinson's disease rating scale. In: Fahn S, Marsden  
459 C, Goldstein M, Calne D, editors. *Recent developments in Parkinson's disease*. Florham  
460 Park, NJ: Macmillan Healthcare Information; 1987. p. 153-63, 293-304.
- 461 Feigl B, Mattes D, Thomas R, Zele AJ. Intrinsically photosensitive (melanopsin) retinal  
462 ganglion cell function in glaucoma. *Invest Ophthalmol Vis Sci* 2011; 52: 4362-7.

- 463 Feigl B, Zele AJ. Melanopsin-expressing intrinsically photosensitive retinal ganglion cells in  
464 retinal disease. *Optom Vis Sci* 2014; 91: 894-903.
- 465 Feigl B, Zele AJ, Fader SM, Howes AN, Hughes CE, Jones KA, *et al.* The post-illumination  
466 pupil response of melanopsin-expressing intrinsically photosensitive retinal ganglion cells  
467 in diabetes. *Acta Ophthalmol (Copenh)* 2011; 90: e230-e4.
- 468 Folstein MF, Folstein SE, McHugh PR. "Mini-mental state": A practical method for grading  
469 the cognitive state of patients for the clinician. *J Psychiatr Res* 1975; 12: 189-98.
- 470 Fotiou DF, Stergiou V, Tsiptsios D, Lithari C, Nakou M, Karlovasitou A. Cholinergic  
471 deficiency in Alzheimer's and Parkinson's disease: Evaluation with pupillometry. *Int J*  
472 *Psychophysiol* 2009; 73: 143-9.
- 473 Gamlin PDR, McDougal DH, Pokorny J, Smith VC, Yau KW, Dacey DM. Human and  
474 macaque pupil responses driven by melanopsin-containing retinal ganglion cells. *Vision*  
475 *Res* 2007; 47: 946-54.
- 476 Goetz CG, Lutge W, Tanner CM. Autonomic dysfunction in Parkinson's disease. *Neurology*  
477 1986; 36: 73.
- 478 Gooley JJ, Lu J, Chou TC, Scammell TE, Saper CB. Melanopsin in cells of origin of the  
479 retinohypothalamic tract. *Nat Neurosci* 2001; 4: 1165.
- 480 Gracitelli CPB, Duque-Chica GL, Roizenblatt M, Moura ALdA, Nagy BV, Ragot de Melo G,  
481 *et al.* Intrinsically photosensitive retinal ganglion cell activity is associated with decreased  
482 sleep quality in patients with Glaucoma. *Ophthalmology* 2015; 122: 1139-48.
- 483 Hajee ME, March WF, Lazzaro DR, *et al.* Inner retinal layer thinning in Parkinson disease.  
484 *Arch Ophthalmol* 2009; 127: 737-41.
- 485 Hannibal J, Kankipati L, Strang CE, Peterson BB, Dacey D, Gamlin PD. Central projections  
486 of intrinsically photosensitive retinal ganglion cells in the macaque monkey. *J Comp*  
487 *Neurol* 2014; 522: 2231-48.
- 488 Harnois C, Di Paolo T. Decreased dopamine in the retinas of patients with Parkinson's  
489 disease. *Invest Ophthalmol Vis Sci* 1990; 31: 2473-5.
- 490 Hattar S, Kumar M, Park A, Tong P, Tung J, Yau KW, *et al.* Central projections of  
491 melanopsin-expressing retinal ganglion cells in the mouse. *J Comp Neurol* 2006; 497:  
492 326-49.
- 493 Hattar S, Liao H-W, Takao M, Berson DM, Yau K-W. Melanopsin-containing retinal  
494 ganglion cells: Architecture, projections, and intrinsic photosensitivity. *Science* 2002; 295:  
495 1065-70.
- 496 Hoehn MM, Yahr MD. Parkinsonism onset, progression, and mortality. *Neurology* 1967; 17:  
497 427-.
- 498 Hu C, Hill DD, Wong KY. Intrinsic physiological properties of the five types of mouse  
499 ganglion-cell photoreceptors. *J Neurophysiol* 2013; 109: 1876-89.
- 500 Inzelberg R, Ramirez JA, Nisipeanu P, Ophir A. Retinal nerve fiber layer thinning in  
501 Parkinson disease. *Vision Res* 2004; 44: 2793-7.
- 502 Jain S, Siegle GJ, Gu C, Moore CG, Ivanco LS, Jennings JR, *et al.* Autonomic insufficiency  
503 in pupillary and cardiovascular systems in Parkinson's disease. *Parkinsonism Relat Disord*  
504 2011; 17: 119-22.
- 505 Jankovic J. Parkinson's disease: clinical features and diagnosis. *J Neurol Neurosurg*  
506 *Psychiatry* 2008; 79: 368-76.
- 507 Joyce DS, Feigl B, Cao D, Zele AJ. Temporal characteristics of melanopsin inputs to the  
508 human pupil light reflex. *Vision Res* 2015; 107: 58-66.
- 509 Joyce DS, Feigl B, Zele AJ. The effects of short-term light adaptation on the human post-  
510 illumination pupil response. *Invest Ophthalmol Vis Sci* 2016; 57: 5672-80.
- 511 Joyce DS, Feigl B, Zele AJ. Melanopsin-mediated post-illumination pupil response in the  
512 peripheral retina. *J Vis* 2016; 16: 5-.

- 513 Kankipati L, Girkin CA, Gamlin PD. Post-illumination pupil response in subjects without  
514 ocular disease. *Invest Ophthalmol Vis Sci* 2010; 51: 2764-9.
- 515 Kardon R, Anderson SC, Damarjian TG, Grace EM, Stone E, Kawasaki A. Chromatic pupil  
516 responses. Preferential activation of the melanopsin-mediated versus outer photoreceptor-  
517 mediated pupil light reflex. *Ophthalmology* 2009; 116: 1564-73.
- 518 Kerr GK, Worringham CJ, Cole MH, Lacherez PF, Wood JM, Silburn PA. Predictors of  
519 future falls in Parkinson disease. *Neurology* 2010; 75: 116-24.
- 520 Liao H-W, Ren X, Peterson BB, Marshak DW, Yau K-W, Gamlin PD, *et al.* Melanopsin-  
521 expressing ganglion cells on macaque and human retinas form two morphologically  
522 distinct populations. *J Comp Neurol* 2016; 524: 2845-72.
- 523 Lowenstein O, Feinberg R, Loewenfeld IE. Pupillary movements during acute and chronic  
524 fatigue A new test for the objective evaluation of tiredness. *Invest Ophthalmol Vis Sci*  
525 1963; 2: 138-57.
- 526 Lüdtke H, Wilhelm B, Adler M, Schaeffel F, Wilhelm H. Mathematical procedures in data  
527 recording and processing of pupillary fatigue waves. *Vision Res* 1998; 38: 2889-96.
- 528 Magee CA, Caputi P, Iverson DC, Huang X-F. An investigation of the dimensionality of the  
529 Pittsburgh Sleep Quality Index in Australian adults. *Sleep Biol Rhythms* 2008; 6: 222-7.
- 530 Markwell EL, Feigl B, Zele AJ. Intrinsically photosensitive melanopsin retinal ganglion cell  
531 contributions to the pupillary light reflex and circadian rhythm. *Clin Exp Optom* 2010; 93:  
532 137-49.
- 533 Maynard ML, J. Zele A, S. Kwan A, Feigl B. Intrinsically photosensitive retinal ganglion cell  
534 function, sleep efficiency and depression in advanced age-related Macular Degeneration.  
535 *Invest Ophthalmol Vis Sci* 2017; 58: 990-6.
- 536 McDougal DH, Gamlin PD. Autonomic control of the eye. *Comprehensive Physiology* 2015;  
537 5: 439-73.
- 538 Micieli G, Tassorelli C, Martignoni E, Pacchetti C, Bruggi P, Magri M, *et al.* Disordered  
539 pupil reactivity in Parkinson's disease. *Clin Auton Res* 1991; 1: 55-8.
- 540 Micieli G, Tosi P, Marcheselli S, Cavallini A. Autonomic dysfunction in Parkinson's disease.  
541 *Neurol Sci* 2003; 24: s32-s4.
- 542 Morrison S, Kerr G, Newell KM, Silburn PA. Differential time- and frequency-dependent  
543 structure of postural sway and finger tremor in Parkinson's disease. *Neurosci Lett* 2008;  
544 443: 123-8.
- 545 Mure LS, Cornut PL, Rieux C, Drouyer E, Denis P, Gronfier C, *et al.* Melanopsin bistability:  
546 A fly's eye technology in the human retina. *PLoS One* 2009; 4: e5991.
- 547 Nasir-Ahmad S, Lee SCS, Martin PR, Grünert U. Melanopsin-expressing ganglion cells in  
548 human retina: Morphology, distribution, and synaptic connections. *J Comp Neurol* 2017:  
549 1-16.
- 550 Nguyen-Legros J. Functional neuroarchitecture of the retina: Hypothesis on the dysfunction  
551 of retinal dopaminergic circuitry in Parkinson's disease. *Surg Radiol Anat* 1988; 10: 137-  
552 44.
- 553 Nishimura C, Kuriyama K. Alterations in the retinal dopaminergic neuronal system in rats  
554 with streptozotocin-induced Diabetes. *J Neurochem* 1985; 45: 448-55.
- 555 Pagan FL. Improving outcomes through early diagnosis of Parkinson's disease. *The American*  
556 *Journal of Managed Care* 2012; 18: S176-82.
- 557 Park JC, Moura AL, Raza AS, Rhee DW, Kardon RH, Hood DC. Toward a clinical protocol  
558 for assessing rod, cone, and melanopsin contributions to the human pupil response. *Invest*  
559 *Ophthalmol Vis Sci* 2011; 52: 6624-35.
- 560 Pincus SM. Approximate entropy as a measure of system complexity. *Proc Natl Acad Sci U*  
561 *S A* 1991; 88: 2297-301.



- 562 Provencio I, Jiang G, De Grip WJ, Hayes WP, Rollag MD. Melanopsin: An opsin in  
563 melanophores, brain, and eye. *Proc Natl Acad Sci U S A* 1998; 95: 340-5.
- 564 Provencio I, Rollag MD, Castrucci AM. Photoreceptive net in the mammalian retina. *Nature*  
565 2002; 415: 493-.
- 566 Ramaker C, Marinus J, Stiggelbout AM, van Hilten BJ. Systematic evaluation of rating scales  
567 for impairment and disability in Parkinson's disease. *Mov Disord* 2002; 17: 867-76.
- 568 Rochester L, Yarnall AJ, Baker MR, David RV, Lord S, Galna B, *et al.* Cholinergic  
569 dysfunction contributes to gait disturbance in early Parkinson's disease. *Brain* 2012; 135:  
570 2779-88.
- 571 Stergiou V, Fotiou D, Tsiptsios D, Haidich B, Nakou M, Giantselidis C, *et al.* Pupillometric  
572 findings in patients with Parkinson's disease and cognitive disorder. *Int J Psychophysiol*  
573 2009; 72: 97-101.
- 574 van de Kraats J, van Norren D. Optical density of the aging human ocular media in the visible  
575 and the UV. *Journal of the Optical Society of America, A* 2007; 24: 1842-57.
- 576 Van Hook MJ, Wong KY, Berson DM. Dopaminergic modulation of ganglion-cell  
577 photoreceptors in rat. *Eur J Neurosci* 2012; 35: 507-18.
- 578 Videnovic A, Golombek D. Circadian and sleep disorders in Parkinson's disease. *Exp Neurol*  
579 2013; 243: 45-56.
- 580 Videnovic A, Noble C, Reid KJ, *et al.* Circadian melatonin rhythm and excessive daytime  
581 sleepiness in parkinson disease. *JAMA Neurology* 2014; 71: 463-9.
- 582 Viney TJ, Balint K, Hillier D, Siegert S, Boldogkoi Z, Enquist LW, *et al.* Local retinal  
583 circuits of melanopsin-containing ganglion cells identified by transsynaptic viral tracing.  
584 *Curr Biol* 2007; 17: 981-8.
- 585 Visser M, Marinus J, Stiggelbout AM, Van Hilten JJ. Assessment of autonomic dysfunction  
586 in Parkinson's disease: The SCOPA-AUT. *Mov Disord* 2004; 19: 1306-12.
- 587 Vugler AA, Redgrave P, Semo M, Lawrence J, Greenwood J, Coffey PJ. Dopamine neurones  
588 form a discrete plexus with melanopsin cells in normal and degenerating retina. *Exp*  
589 *Neurol* 2007; 205: 26-35.
- 590 Zele AJ, Feigl B, Smith SS, Markwell EL. The circadian response of intrinsically  
591 photosensitive retinal ganglion cells. *PLoS One* 2011; 6: e17860.
- 592 Zhang D-Q, Wong KY, Sollars PJ, Berson DM, Pickard GE, McMahon DG. Intraretinal  
593 signaling by ganglion cell photoreceptors to dopaminergic amacrine neurons. *Proc Natl*  
594 *Acad Sci U S A* 2008; 105: 14181-6.

595
